1 **Mechanosensory input during circuit formation**  
2 **shapes *Drosophila* motor behavior through**  
3 **Patterned Spontaneous Network Activity**

4  
5 Arnaldo Carreira-Rosario<sup>1,2</sup>, Ryan A. York<sup>1</sup>, Minseung Choi<sup>1</sup>, Chris Q. Doe<sup>2\*</sup>, and Thomas  
6 R. Clandinin<sup>1\*</sup>

7  
8 <sup>1</sup>Department of Neurobiology, Stanford University, Stanford, CA 94305

9  
10 <sup>2</sup>Institute of Neuroscience, Howard Hughes Medical Institute, University of Oregon,  
11 Eugene, OR 97403

12  
13 \* Authors for correspondence at [trc@stanford.edu](mailto:trc@stanford.edu) or [cdoe@uoregon.edu](mailto:cdoe@uoregon.edu)

14  
15 Keywords: nervous system development; development of locomotor behavior;  
16 *Drosophila* embryo

17  
18  
19 Highlights

- 20 ● PaSNA in the *Drosophila* embryonic CNS is spatiotemporally stereotyped  
21 ● Mechanosensory neurons negatively modulate PaSNA  
22 ● Embryonic PaSNA is required for larval locomotor behavior

23  
24  
25  
26  
27  
28  
29  
30  
31  
32

## 33 **Summary**

34 Neural activity sculpts circuit wiring in many animals. In vertebrates, patterned  
35 spontaneous network activity (PaSNA) generates sensory maps and establishes local  
36 circuits<sup>1-3</sup>. However, it remains unclear how PaSNA might shape neuronal circuits and  
37 behavior in invertebrates. Previous work in the developing *Drosophila* embryo  
38 discovered spontaneous muscle activity that did not require synaptic transmission, and  
39 hence was myogenic, preceding PaSNA<sup>4-6</sup>. These studies, however, monitored muscle  
40 movement, not neural activity, and were therefore unable to observe how myogenic  
41 activity might relate to subsequent neural network engagement. Here we use calcium  
42 imaging to directly record neural activity and characterize the emergence of PaSNA. We  
43 demonstrate that the spatiotemporal properties of PaSNA are highly stereotyped across  
44 embryos, arguing for genetic programming. Consistent with previous observations, we  
45 observe neural activity well before it becomes patterned, initially emerging during the  
46 myogenic stage. Remarkably, inhibition of mechanosensory input as well as inhibition of  
47 muscle contractions results in premature and excessive PaSNA, demonstrating that  
48 muscle movement serves as a brake on this process. Finally, using an optogenetic  
49 strategy to selectively disrupt mechanosensory inputs during PaSNA, followed by  
50 quantitative modeling of larval behavior, we demonstrate that mechanosensory  
51 modulation during development is required for proper larval foraging. This work thus  
52 provides a foundation for using the *Drosophila* embryo to study the role of PaSNA in  
53 circuit formation, provides mechanistic insight into how PaSNA is entrained by motor  
54 activity, and demonstrates that spontaneous network activity is essential for locomotor  
55 behavior. These studies argue that sensory feedback during the earliest stages of circuit  
56 formation can sculpt locomotor behaviors through innate motor learning.

57

## 58 **Results**

### 59 **PaSNA in the *Drosophila* embryo**

60 Motor movements begin in the embryo as uncoordinated twitching at stage 16,  
61 followed by larger scale movements that progressively become stronger and more  
62 organized prior to hatching approximately 7 hours later (Figure 1A). To characterize  
63 the emergence of neural activity across these stages, as well as to make

64 comparisons between animals, and to facilitate rapid screening of neural and  
65 molecular perturbations, we developed a wide-field imaging preparation in which we  
66 could monitor neural activity in 25-35 embryos simultaneously (Figure 1B; Methods).  
67 We expressed the genetically encoded calcium indicator GCaMP6s in all neurons,  
68 while co-expressing nuclear TdTomato to allow for ratiometric imaging, and acquired  
69 images every 7 seconds from the myogenic stage through hatching (Video S1).  
70 Under these imaging conditions, 95% of control animals hatched ( $n = 60$ ),  
71 demonstrating that this preparation does not disrupt normal development. Finally, to  
72 correct for small variations in the developmental timing of individual embryos, we  
73 monitored ventral nerve cord (VNC) condensation and normalized developmental  
74 stage by computing the ratio of the length of the embryo to the length of the central  
75 nervous system (CNS) (Figure S1A), following standard methods <sup>7,8</sup>.

76

77 Consistent with the pattern of muscle movements <sup>5</sup>, we observed episodes in  
78 which intracellular calcium concentrations increased in many neurons and their  
79 processes (Figure 1C, D; Video S1). Strikingly, the timing of the first large wave of  
80 neural activity was highly consistent from animal to animal, appearing at a length  
81 ratio of 2.2 (95%CI [0.06, 0.06]) (Figure S1B), corresponding to early stage 17.  
82 Aligning calcium traces by the timing of the first episode revealed that the overall  
83 PaSNA pattern was qualitatively and quantitatively similar across all embryos (Figure  
84 1D-F). In particular, a total of 17 PaSNA episodes (95%CI [0.99, 0.99]) that occurred  
85 over 275 minutes (95%CI [18.3, 18.3]) preceded hatching (Figure S1B, C).  
86 Moreover, the size and duration of each wave of activity consistently increased over  
87 the first eight waves, before stabilizing (Figure 1E). Finally, in parallel with the  
88 increasing strength of the early episodes, the interbout interval dramatically  
89 decreased over the first five episodes of PaSNA from 21.8 minutes (95% CI [2.3,2.5])  
90 to 13.3 minutes (95% CI [1.1,1.2]) (Figure 1 F). Our stereotypy analysis revealed that  
91 the observed interbout intervals were significantly more stereotyped across embryos  
92 than random (Figure S1D). Taken together, these data show that PaSNA is highly  
93 stereotyped from embryo to embryo, suggesting that PaSNA is genetically encoded.

94

## 95 **Spatiotemporal properties of the initial PaSNA episode**

96 We focused next on the first episode of PaSNA, a period of particular interest  
97 given that it represents the transition from myogenic to neurogenic movement. To  
98 what extent is the pattern of neural activity underlying the first episode stereotyped  
99 across embryos? To investigate the spatiotemporal patterns of neural activity during  
100 single episodes of PaSNA, we developed a two-photon (2P) microscopy preparation  
101 to image embryos expressing pan-neuronal GCaMP6s and TdTomato. This system  
102 allows for imaging of the entire VNC for two hours at cellular resolution, acquiring  
103 imaging volumes at 2.6 Hz. Embryos survive imaging, hatch and become adult flies  
104 (n = 8). To unequivocally identify the first episode of PaSNA, we began imaging at  
105 least 30 minutes before the neurogenic phase. Preceding the first episode of PaSNA,  
106 we observed sporadic neuronal firing throughout the VNC, an activity pattern we refer  
107 to as flickering. This activity was observed during the 30 minutes before the first  
108 PaSNA episode, thus appearing during the myogenic phase of movement<sup>5</sup>. After  
109 this, the first PaSNA episode began, and comprised three phases, namely *localized*  
110 *initiation*, *propagation* and *peak activity* (Figure 2A; Video S2). During the first  
111 phase, we observed increased levels of neural activity within a stereotyped region,  
112 marking the *localized initiation* of PaSNA and defining the start of neurogenic activity.  
113 During the second phase, we observed a single wave of neural activity that traversed  
114 the VNC and defined *propagation*. During the third phase, we observed a period of  
115 *peak activity* along the VNC that persisted for approximately 80 seconds. Activity  
116 then returned to basal levels where an interbout interval containing flickering activity  
117 persisted until the next episode.

118

119 The focal activity observed during the *localized initiation* phase prompted us to  
120 examine whether the location of this event was invariant across embryos. Analysis of  
121 neural activity within ROIs along the anterior-posterior (A-P) axis of the VNC showed  
122 that PaSNA always initiated in the anterior region of the VNC (Figure 2C) (n = 8).  
123 Furthermore, in 100% of embryos, activity initiated in one of the two most anterior  
124 ROIs, a region spanning the thoracic segments. After initiation, activity always  
125 propagated along the A-P axis. Strikingly, the wave of neural activity propagated

126 slowly, reaching the most posterior region of the embryo approximately 75 seconds  
127 after localized initiation, corresponding to a propagation speed of less than 2  $\mu\text{m}$  per  
128 second. Lastly, in all embryos, the more posterior regions were the last to return to  
129 basal, flickering activity. Together, these observations demonstrate that the initial  
130 episode of PaSNA is spatiotemporally patterned.

131

### 132 **The role of neural activity in initiating PaSNA**

133 Next, we examined the role of neural activity in the initiation of PaSNA. To test  
134 whether neuronal depolarization caused the observed calcium transients recorded  
135 with GCaMP, we inhibited depolarization in all neurons through pan-neuronal  
136 expression of the inward-rectifier potassium channel Kir<sub>2.1</sub><sup>9</sup>. As expected, this  
137 abolished flickering during the myogenic phase, as well as all three phases of  
138 PaSNA, indicating that PaSNA is a voltage-dependent process (Figure 2E; Video  
139 S3). Next, we tested whether PaSNA is driven by chemical synapses by inhibiting  
140 synaptic transmission using tetanus toxin (TNT)<sup>9</sup>. Pan-neuronal expression of TNT  
141 had no effect on flickering during the myogenic phase, but prevented all three phases  
142 of PaSNA including the propagating waves of neural activity (Figure 2F; Video S4).  
143 This demonstrates that the flickering preceding PaSNA emerges in the absence of  
144 synaptic transmission, and thus is likely due to the intrinsic membrane excitability of  
145 individual neurons. Together, these results show that while neuronal depolarization  
146 and chemical synaptic transmission are both crucial for PaSNA, only depolarization is  
147 required for flickering.

148

### 149 **Mechanosensory input negatively modulates PaSNA**

150 We next sought to determine whether the initial, myogenic phase of spontaneous  
151 muscle movement might be functionally coupled to the initiation of PaSNA. We  
152 reasoned that this coupling could occur through sensory feedback via proprioceptors.  
153 Therefore, we first asked which proprioceptive neurons are active during the  
154 myogenic phase. We used the calcium integrator system CaLexA, a method for  
155 transcriptionally labeling active neurons (Figure 3A)<sup>10</sup>. To restrict this system to only  
156 those neurons that are active in the absence of synaptic transmission, we used pan-

157 neuronal expression of TNT (Figure 2F; Figure 3A). Thus, the CaLexA reporter can  
158 only be induced in neurons that are active during the myogenic phase, allowing  
159 selective labeling of single cells (Figure 3A). Strikingly, every embryo displayed high  
160 levels of CaLexA expression in mechanosensory chordotonal (mechano-ch) neurons  
161 in most segments (n = 30) (Figure 3B-E). Specifically, observed expression in *lch5* in  
162 every hemisegment as well as expression in *lch1* and *vchA/B* in some segments.  
163 Notably, none of these embryos showed CaLexA signal in any other proprioceptive  
164 neurons.

165  
166 Mechano-ch neurons detect muscle stretch, relaying proprioceptive signals used  
167 to regulate larval crawling speed<sup>11-14</sup>. Additionally, these neurons have been  
168 previously linked to embryonic neural circuit formation<sup>12</sup>, making them ideal  
169 candidates for coupling muscle movements to PaSNA. To test this idea, we first  
170 silenced mechano-ch neurons and examined whether this perturbation altered the  
171 timing or amplitude of PaSNA episodes. To do this, we used the *inactive (iav)*  
172 enhancer to express TNT in mechano-ch neurons, and monitored neural activity  
173 throughout PaSNA using wide-field imaging of pan-neuronally expressed GCaMP6s.  
174 Consistent with previous work demonstrating that blocking all sensory neuron  
175 function did not prevent the emergence of muscle movements<sup>5</sup>, PaSNA was not  
176 abolished after mechano-ch silencing. Strikingly, however, PaSNA started  
177 prematurely in these embryos (Figure 3F). This led to embryos experiencing more  
178 episodes of PaSNA earlier in development (Figure 3G), as well as increasing PaSNA  
179 duration, and the total number of episodes (Figure S2A,B). Importantly, the  
180 amplitude of most PaSNA episodes was increased in these embryos as compared to  
181 controls (Figure 3H). Lastly, interbout intervals remain largely unchanged (Figure  
182 S2C).

183  
184 We reasoned that if mechano-ch neurons were coupling muscle contraction to  
185 PaSNA, there might be an effect of blocking the synaptic transmission in these cells  
186 during the myogenic phase. To test this, we examined the baseline fluorescence of  
187 GCaMP6s (relative to nuclear TdTomato expressed on the same RNA transcript), as

188 a proxy for the intracellular calcium concentration and membrane excitability, before  
189 and after the myogenic phase. As expected, inhibiting mechano-ch neurons had no  
190 effect on baseline fluorescence when muscles are yet to contract, before the  
191 myogenic phase (Figure 3I). Strikingly, inhibiting mechano-ch neurons dramatically  
192 increased the baseline fluorescence signal of GCaMP6s after muscles have  
193 contracted during the myogenic phase (but before PaSNA began; Figure 3I). Such an  
194 increase in baseline GCaMP6s signal is consistent with higher intracellular calcium  
195 concentrations and increased membrane excitability, providing a potential  
196 explanation for the premature onset and increased amplitude of PaSNA seen when  
197 mechano-ch neurons are inhibited. We note that this change in baseline GCaMP6s  
198 fluorescence cannot be accounted by changes in protein expression, as these  
199 measures are normalized relative to TdTomato in every cell. Thus, mechano-ch  
200 neurons act during the myogenic phase. Finally, to complement these results, we  
201 repeated these experiments in embryos expressing the inward rectifying channel  
202 Kir<sub>2.1</sub> in mechano-ch neurons. However, while we observed significant increases in  
203 the amplitudes of initial PaSNA episodes (Figure S2G), overall effects were modest,  
204 suggesting that this functional inhibition was incomplete, and further obscured by  
205 genetic background effects that increased baseline GCaMP6s fluorescence (Figure  
206 S2L).

207

208 If mechano-ch neurons are coupling muscle movements to PaSNA, inhibiting  
209 muscle contractions should have similar effects to inhibiting mechano-ch neurons.  
210 To test this, we inhibited muscle contraction by expressing Kir<sub>2.1</sub> using a muscle  
211 specific driver<sup>15</sup>, while expressing GCaMP6s pan-neuronally. Strikingly, preventing  
212 muscle contraction caused premature PaSNA onset, increased the amplitude of  
213 PaSNA episodes, and led to higher baseline fluorescence in post-myogenic but not  
214 pre-myogenic embryos (Figure 3J-M). Thus silencing muscle contraction, or  
215 proprioceptive neuron function lead to premature onset of PaSNA and increased  
216 amplitude of PaSNA episodes, strongly suggesting that muscle contractions induce  
217 mechano-ch activity during the myogenic phase to negatively modulate PaSNA.

218



## 219 **Developmental inhibition of mechanosensory input leads to abnormal larval** 220 **behavior**

221 Our observation that silencing mechano-ch neurons increased PaSNA raised the  
222 question of whether this change in PaSNA had behavioral consequences, and more  
223 specifically, whether these transient changes in PaSNA resulted in long-term  
224 behavioral deficits. We inhibited mechano-ch activity transiently (from the late  
225 myogenic phase through to the end of PaSNA) by using the *iav* enhancer to express  
226 the *G. theta* anion channelrhodopsin 1 (GtACR1)<sup>16</sup>, and examined larval behavior  
227 24hrs after hatching using the Frustrated Total Internal Reflection-based imaging  
228 method (FIM; Figure 4A)<sup>17</sup>. We employed Time REsolved BehaviorL Embedding  
229 (TREBLE) to characterize potential behavioral differences between the  
230 optogenetically silenced condition and the control. TREBLE is a quantitative  
231 framework for identifying structure in behavior by collecting features (such as larval  
232 posture or velocity) into temporal windows and embedding these into a low-  
233 dimensional space (Figure 4B). As previously shown<sup>18</sup>, we found that the major  
234 components of the larval foraging ethogram<sup>19,20</sup> can be captured in a 2-dimensional  
235 space using TREBLE (Figure 4B, C). In this 2-dimensional space, crawling is  
236 represented by an oscillator with directional movement (Figure S3) and is connected  
237 to regions corresponding to pausing and turning (Figure 4C).

238  
239 In the TREBLE approach, both control and transiently inhibited larvae were used to  
240 generate a single, common behavior space (n = 181 total; 84 control larvae, 97  
241 transiently inhibited larvae); 179,409 windows; see Methods) where we could directly  
242 infer behavioral variation via differences in the likelihood that either control or  
243 experimental larvae occupied specific regions of the space (Figures 4D-E). Control and  
244 inhibited conditions displayed notably different occurrence distributions (Figures 4D-E),  
245 the biggest deviations of which were restricted to specific regions of behavior space  
246 (Figure 4F). Control larvae were more likely to visit parts of the behavior space that  
247 correspond to pauses and bends (Figure 4F; Figure S3) while inhibited larvae spent  
248 more time, proportionally, in the crawling oscillator (Figure 4F). To confirm these  
249 differences using a TREBLE independent approach, we compared the primary



250 behavioral features themselves, as measured using the FIM system, and observed that  
251 inhibited larvae bend less, crawl further, and have a significantly increased velocity  
252 distribution relative to control animals (Figure 4G).

253

254 Finally, to quantitatively compare control and transiently inhibited larvae in the  
255 TREBLE space, we clustered the behavior space based on similarity to identify discrete  
256 elements of behavior that together represent foraging (see Methods). We then  
257 examined whether control and transiently inhibited larvae displayed changes in the  
258 frequency of occurrence of discrete behavioral motifs (Figure 4H). Reflecting our  
259 previous findings, the mechano-ch silenced and control animals displayed different  
260 overall distributions (Figure 4I) and significantly varied across a number of behavioral  
261 motifs (Figure 4J; trial-wise Kruskal-Wallis test). Specifically, controls were more likely to  
262 pause (Figure 4J; dark blue cluster;  $p < 0.01$ ) and head cast during crawling (Figure 4J;  
263 dark orange cluster;  $p < 0.002$ ) while the mechano-ch silenced larvae were more likely to  
264 be crawling (Figure 4J; red, orange, light green clusters). These findings demonstrate  
265 that developmental inhibition of mechano-ch neurons leads to an apparent simplification  
266 of larval foraging behavior, biasing animals toward ongoing crawling as opposed to the  
267 typical sequence of crawling, pausing, and head casting.

268

## 269 **Discussion**

270 These studies demonstrate that PaSNA in the *Drosophila* embryo follows a  
271 stereotyped sequence of wave-like, large-scale network activation events  
272 interspersed by low-activity periods (Figure 1, 2). Strikingly, our data also  
273 demonstrate that muscle contractions shape the magnitude of PaSNA via  
274 mechanosensory input, beginning during the myogenic phase, but perhaps also  
275 continuing throughout each subsequent wave (Figure 3). Transiently disrupting this  
276 mechanosensory feedback during embryonic development results in deficits in larval  
277 locomotor behavior, arguing that neural activity plays a critical role in the functional  
278 organization of locomotor circuits (Figure 4). These results suggest that sensory  
279 inputs generated by spontaneous muscle contraction play a role in subsequent circuit

280 establishment, thereby providing one of the earliest examples of sensory regulation  
281 of locomotor development in any context.

282

283 Our work has measured the trajectory of neural activity across embryonic  
284 development. Prior to PaSNA, individual CNS neurons display transient elevations in  
285 intracellular calcium levels (flickering) that depend on depolarization of the plasma  
286 membrane, but which are independent of synaptic input. We hypothesize that these  
287 cells are spontaneously excitable. In addition, as previous work has demonstrated,  
288 muscle twitching independent of neural activity also occurs, and based on our work,  
289 appears to lead to the selective activation of mechano-ch sensory neurons. The  
290 output of mechano-ch neurons then acts to negatively modulate the basal levels of  
291 intracellular calcium in the CNS, the onset of PaSNA, and the amplitude of PaSNA  
292 waves. While it is possible that the activation of mechano-ch neurons occurs  
293 independently of muscle contraction, given the phenotypic similarities revealed by  
294 muscle inhibition and mechano-ch inhibition (Figure 3), we favor a model where  
295 mechano-ch neuronal activity is driven by muscle contraction.

296

297 Our data demonstrate that the first episode of PaSNA invariably begins in the  
298 thoracic region (Figure 2). After this initial event, PaSNA proceeds through a  
299 stereotyped sequence of accelerating, intensifying waves through to hatching. Given  
300 the striking similarity in both the spatial and temporal properties of PaSNA in the  
301 embryo, as well as analogous observations in the *Drosophila* visual system<sup>21</sup>, we  
302 hypothesize that this process is under tight genetic control. Similarly, observations  
303 across systems, including in the mammalian cortex, have led to speculation that  
304 genetic information underlies the spontaneous neuronal activity present in these  
305 developing circuits<sup>22</sup>. Intriguingly, our observations parallel previous results in the  
306 developing chick spinal cord, where waves of activity are also preceded by sporadic  
307 activity and PaSNA initiates in a localized region at the anterior part of the spinal cord  
308<sup>23</sup>. We speculate that evolutionarily ancient mechanisms initiate PaSNA in motor  
309 systems in both invertebrates and vertebrates. Our characterization of the initiation

310 and progression of PaSNA in the *Drosophila* embryo sets the stage for the dissection  
311 of these mechanisms at the level of specific circuits, cells, and molecules.

312

313 Our quantitative measurements of PaSNA put constraints on the molecular basis  
314 of its implementation. In particular, the speed with which a single wave of activity  
315 traverses the nervous system is remarkably slow, taking approximately 75 seconds to  
316 move from the initiation zone to the most posterior region of the VNC. By  
317 comparison, the wave of neural activity needed to produce a wave of crawling takes  
318 approximately one second to travel the same distance<sup>24,25</sup>. We infer that wave  
319 propagation during embryogenesis is unlikely to proceed by a simple neuron-to-  
320 neuron sequence of synaptic transmission events. Understanding the cellular and  
321 molecular basis of this wave propagation mechanism represents an important  
322 challenge for future work.

323

324 Most previous studies examining PaSNA function in shaping developing circuits rely  
325 on perturbations that abolish PaSNA. Interestingly, our study shows that an increase in  
326 PaSNA also leads to changes in behavior. This result suggests that organisms must  
327 quantitatively tune the level of PaSNA during circuit establishment. Supporting this,  
328 previous studies have demonstrated that excessive neuronal activity during larval circuit  
329 formation leads to hyperexcitable motor circuits that are prone to seizures<sup>26,27</sup>. It is  
330 possible that the excessive PaSNA experienced after mechano-ch inhibition leads to  
331 hyperexcitability of specific neurons within the circuits that control foraging behavior.  
332 Identifying the neurons affected upon mechano-ch transient inhibition and probing their  
333 electrophysiological properties will test this idea.

334

335 Relatively little attention has been paid to examining the role of spontaneous neural  
336 activity in shaping innate behaviors. In that light, our finding that the activity of mechano-  
337 ch neurons during development shapes locomotor behavior is remarkable. Given that  
338 this behavioral effect is developmentally programmed, we hypothesize that mechano-ch  
339 input is needed to pattern connectivity or determine the physiological properties of  
340 specific cells in developing motor circuits. Indeed, blocking synaptic transmission in

341 mechano-ch neurons throughout development changes the connectivity of these cells  
342 with their post-synaptic partners, cells that mediate behavioral responses to vibration <sup>28</sup>.  
343 We hypothesize that the changes that mechano-ch inputs exert on developing circuits  
344 are, in fact, widespread, modifying circuits across the CNS through PaSNA. Supporting  
345 this idea, the locomotor phenotype of inhibiting mechano-ch neurons after PaSNA is very  
346 different from our targeted developmental inhibition of the same neurons <sup>12-14</sup>. In  
347 vertebrates, motor feedback is crucial to shaping learned motor behaviors through  
348 activity-dependent mechanisms <sup>29</sup>. It is tempting to speculate that the sculpting of innate  
349 foraging behavior by mechano-ch neuron activity in *Drosophila* reveals an analogous,  
350 evolutionarily ancient mechanism that may have been co-opted in other contexts to  
351 enable motor learning.

352

## 353 **Materials and Methods**

### 354 Fly Stocks

355 All stocks were kept at 25°C on molasses-based food. The following stocks were used:  
356 UAS-IVS-Syn21-GCaMP6s-P2A-nls-tdTomato-p10 on JK66B was a gift from Marta  
357 Zlatic (MRC Laboratory of Molecular Biology). LexAop- Kir<sub>2.1</sub> at VIE-260B, UAS- Kir<sub>2.1</sub> at  
358 VIE-260B and LexAop-TNT on VIE-260B were gifts from Barry Dickson (The University  
359 of Queensland). pBDP-LexA:p65 on attP40 was a gift from T. Shirangi (Villanova  
360 University). UAS-GtACR1 at attP2 was a gift from A. Claridge-Chang (Duke-NUS Med  
361 School). The following stocks were obtained from the Bloomington Drosophila Stock  
362 Center: elav-GAL4.L on 3rd (BDSC# 8760), elav-GAL4.L on 2nd (BDSC# 8765), elav-  
363 GAL4.L on 3rd (BDSC# 8760), GMR44H10-lexa::p65 on attP40 (BDSC# 61543),  
364 elav<sup>c155</sup>-GAL4 (BDSC# 458), UAS-TeTxLC.tnt G2 (BDSC# 28838), UAS-mLexA-VP16-  
365 NFAT, LexAop-rCD2-GFP (CaLexA) (BDSC# 66542), LexAop-CD8-GFP-2A-CD8-GFP  
366 on 2nd (BDSC# 66545), iav-lexA::p65 <sup>30</sup> on VK00013 (BDSC# 52246), attP-9A  
367 VK000013 (BDSC# 9732) and iav-GAL4.K on 3rd (BDSC# 52273).

368

### 369 Embryo collection for calcium imaging

370 For all imaging experiments, embryos were collected in 15-30 minute time windows  
371 the day before imaging, and grown at 25°C or 23°C on standard 3.0% agar molasses

372 collection caps covered with a thin layer of wet yeast. Before imaging, embryos were  
373 dechorionated with double-sided tape and staged using elongation of the anterior  
374 midgut as a guide <sup>4,7</sup>. To prevent dehydration, embryos were transferred into  
375 Halocarbon oil or saline no more than 5 minutes after dechorionation.

#### 376 Wide-field imaging

377 Staged, dechorionated embryos were mounted ventral side up on double-sided tape,  
378 covered with Halocarbon oil (180 cSt) and imaged using a Leica M205 FA system with a  
379 Plan Apo Corr. 2X objective. For experiments shown in Figure 3 D-F, embryos were  
380 mounted on Sylgard covered with an oxygenated saline solution (103 mM NaCl, 3 mM  
381 KCl, 5 mM TES, 1 mM NaH<sub>2</sub>PO<sub>4</sub>, 4 mM MgCl<sub>2</sub>, 1.5 mM CaCl<sub>2</sub>, 10 mM trehalose, 10  
382 mM glucose, 7 mM sucrose, and 26 mM NaHCO<sub>3</sub>). Stereoscopic magnification was  
383 used to achieve a final magnification of 64X (Figure 1) and 80X (Figure 3 D-F,).  
384 Fluorescent signals were acquired using LED illumination (CooLED pE-300 white).  
385 GCaMP6s was excited and collected using an ET470/40x ET525/50m band-pass filter  
386 set, while tdTomato was excited and collected using an ET545/25x ET605/70m band-  
387 pass filter set, acquiring each signal sequentially. Each cycle of imaging acquisition was  
388 7 seconds long. We used a back-thinned sCMOS camera (Orca-Fusion BT -  
389 Hamamatsu) to capture images at a 1024 x 1024 resolution (after 2x2 binning),  
390 corresponding to a pixel size of 2.0 μm x 2.0 μm (Figure1); and 512 x 512 resolution  
391 (after 4x4 binning), corresponding to a pixel size of 3.3 μm x 2.3 μm (Figure 3 D-F).  
392 Imaging sessions were from 2 hrs to 9 hrs in duration, depending on the experiment, and  
393 were conducted at 23±3°C.

#### 394 Two-photon imaging

395 Staged, dechorionated embryos were mounted ventral side up on Sylgard pads and  
396 imaged using a Bruker Ultima system. We used a Leica 20X HCX APO 1.0 NA water  
397 immersion objective lens, a piezo objective mount, resonant scanning and GaAsP PMTs.  
398 GCaMP6s and tdTomato signals were excited with a Chameleon Vision II laser  
399 (Coherent) at 920nm, and collected through a 525/50nm or a 595/50nm filter,  
400 respectively. Both signals were simultaneously collected using resonant scanning mode.  
401 Imaging volumes were acquired at an XY resolution of 358 x 148 (corresponding to a

402 pixel size of 1.05  $\mu\text{m}$  x 1.05  $\mu\text{m}$ ), with 41 z-sections separated by 1.5 $\mu\text{m}$  steps, at a  
403 volume rate of 2.6Hz. During the entire imaging session embryos were submerged in  
404 an oxygenated saline solution (as above), and kept at 25C°.

#### 405 Immunostaining and confocal imaging

406 Immunostaining was performed as previously described<sup>31</sup>. The 1° antibody used was  
407 chicken anti-GFP (1:2,000, Abcam). The 2° antibody used was anti-chicken Alexa 488  
408 (1:500, Life Technologies). Confocal image stacks were acquired on a Leica SP8, using  
409 40X HC PL APO 40X 1.3NA oil objective and a HyD detector. Images were processed  
410 in Fiji (<https://imagej.net/Fiji>). Adjustments to brightness and contrast were applied  
411 uniformly to the entire image.

#### 412 Behavior data collection

413 Parents were crossed and fed with wet yeast containing 0.5 mM all *trans*-Retinal  
414 (ATR) at least three days before embryo collection. ATR and yeast were replaced  
415 every day. Embryos were collected for 30 minutes on standard 3.0% agar molasses  
416 collection caps covered with a thin layer of wet yeast without ATR and incubated at  
417 25°C in darkness. 15.5 hours later, embryos were placed under a 3.8uW/mm<sup>2</sup>  
418 550nm LED for 5 hours. Light pulses 600ms long were delivered at one second  
419 intervals, as previously shown to induce inhibition in *Drosophila* embryos using  
420 halorhodopsin<sup>26</sup>. Halorhodopsin, like GtACR1, is a silencing optogenetic tool that  
421 relies on chloride ions entering the cell. Control animals were kept in the same  
422 incubator, in darkness. One day after light exposure was terminated, at the L1 stage,  
423 animals were collected and transferred to a Petri dish with 1.0% agar and relocated to  
424 a room kept at 23°C and 60% humidity. After 10 minutes of acclimation to the room,  
425 groups of 8 to 12 larvae were transferred to a 7.5 x 7.5 cm 1.0% agar arena. After 15  
426 to 30 seconds, locomotion was recorded using a FIM imaging system (<sup>17</sup>  
427 <https://www.uni-muenster.de>) at 10 fps for 5 minutes. The FIM system was equipped  
428 with an azA2040-25gm camera (Basler) and a TEC-V7X macro zoom lens  
429 (Computar). Individual larvae were then tracked using FIMtrack software<sup>17,32</sup>.  
430 Primary measurements from FIMtrack were used for behavioral analyses (see  
431 below).



432

## 433 **Quantitative and statistical analysis**

### 434 Processing of calcium imaging data

435 After image acquisition, regions of interest (ROIs) were manually drawn on the  
436 ventral nerve cords and mean intensities were extracted using LAS X software (Leica  
437 Microsystems). For Figure 2 ROIs were drawn on Fiji (<https://imagej.net/Fiji>). To  
438 account for movement of the embryo and changes in gene expression over time, we  
439 encoded and recorded a structural fluorescent marker (tdTomato) in conjunction with  
440 the calcium sensor (GCaMP6s) and considered the ratio of the latter to the former as  
441 our measurement of calcium levels in the embryo. This ratiometric calcium signal  
442 was then converted into  $\Delta F/F$  signal, dependent on a baseline signal computed  
443 separately for each embryo. For figures 2 and 3, the initial baseline for  $\Delta F/F$  prior to  
444 peak detection was determined by calculating the mean of the 100 values lowest  
445 ratiometric values. For figure 1, the baseline for each time point in the ratiometric  
446 calcium signal was computed as a function of 16 minutes of the signal flanking the  
447 time point of interest (8 minutes prior to and 8 minutes after the time point). The 16-  
448 minute signal was divided into 20 bins of signal amplitude ranges. The bin with the  
449 largest number of samples was taken to primarily reflect the baseline, while other  
450 bins were taken to reflect deviations from the baseline. The choice of 20 bins was  
451 made empirically based on the sparsity of neuronal activity. The mean of the  
452 samples in the largest bin was considered the baseline value for the time point in the  
453 middle. At the two edges of the signal, where the full 8 minutes prior to or after the  
454 considered time point do not exist, linear fits were used as the baseline. A 150-  
455 second, quartic Savitzky–Golay filter was applied to the resulting  $\Delta F/F$  signal.

456

### 457 Episode and peak detection

458 For figures 2, a 150-second, cubic Savitzky–Golay filter was first applied to the initial  
459  $\Delta F/F$  trace. Standard deviation for the filtered data was then calculated. Candidate  
460 first episodes were detected by finding the first instance where the filtered signal is  
461 equal to or greater than 1.2 times the standard deviation. Given that the intervals  
462 between episodes are at least 25 minutes, the large increase in signal must appear



463 after a minimum of 30 minutes in order to be considered as a bona fide first episode.  
464 These candidate episodes were then manually curated for miss-called episodes due  
465 to small fluctuations that resulted in rapid increase in signal but were not sustained  
466 over longer than 20 seconds. Traces were then trimmed from -245 to 800 seconds  
467 (time series plots) relative to the initiation of the episode. These traces were used to  
468 calculate a new  $\Delta F/F$  with a new baseline that was calculated as the mean of the 25  
469 timepoints with the lowest signal. The Seaborn library was then used to plot traces.

470

471 For Figures 1 and 3, where episodes throughout PaSNA were monitored, peaks  
472 in the  $\Delta F/F$  signal were detected using thresholds in the zeroth, first, and second  
473 derivatives of the signal. Each derivative signal was filtered with a 150-second,  
474 quartic Savitzky-Golay filter. The first derivative threshold was used to detect a rapid  
475 rise, while the second derivative was used to detect concavity. First, values crossing  
476 the zeroth derivative threshold were identified as peak candidates. A minimum peak  
477 distance of 500 seconds was enforced, following a greedy heuristic that kept  
478 candidates with the largest values first. Manually analyzed data showed that distinct  
479 episodes are invariably separated by more than 600 seconds. Then, of the  
480 remaining candidates, only those preceded by threshold crossings in both the first  
481 derivative and the second derivative within 210 seconds were kept and detected as  
482 episodes. Minimum thresholds of 0.06 for the zeroth derivative and 0.006 for the first  
483 derivative were derived empirically, while the maximum threshold of 0 for the second  
484 derivative was chosen to select for concavity. For Figure 3 and FigureS2 we  
485 calculated the area under the curve 20 seconds surrounding the peak using the  
486 trapezoidal rule.

487

#### 488 Stereotypy of episode timing

489 We assessed the extent to which PaSNA episodes occurred with stereotyped  
490 interpeak intervals by comparing the episode interval distributions of embryos to  
491 those generated under a null model. Under the null model, episodes corresponding  
492 to each real embryo occurred randomly following a Poisson process with a rate  
493 parameter equal to the mean rate of the first twelve episodes in the real embryo. In

494 our Monte Carlo sampling of interpeak intervals, we rejected those under 500  
495 seconds, consistent with the minimum peak distance imposed in our peak detection  
496 algorithm. We sampled 1,000,000 model embryos for each of 23 real embryos such  
497 that more than 500,000 remained after the rejections. We then computed the root  
498 mean squared error (RMSE) from the mean for each model dataset of 23 embryos,  
499 and the resulting distribution was compared against the RMSE computed for each  
500 peak in the real dataset. We assessed significance by examining how many model  
501 datasets had RMSE lower than that of each peak in the real dataset, and corrected  
502 for multiple comparisons using the Holm-Bonferroni method.

503

#### 504 Statistical analysis

505 Statistical tests for Figure 3F, I, J, M; Figure S2A, B, E, H, I, J were done with  
506 Graphpad Prism. Statistical tests for Figure 3H, L; FigureS2C, D, G, K were done  
507 with scipy and statsmodels libraries. For two group comparisons with equal variance,  
508 we conducted unpaired- student's t-test. For two group comparisons with unequal  
509 variance, we conducted Welch's t-test. For three groups comparisons with unequal  
510 variance, we conducted Brown-Forsythe and Welch ANOVA followed by a Dunnett's  
511 T3 multiple comparison test. For multiple comparison of two groups we used an  
512 unpaired student's t-test with Holm-Bonferroni method.

513

#### 514 Behavioral analysis

515 Primary measurements from FIMtrack<sup>33</sup> reflecting larval size, shape, and velocity were  
516 used for input, in addition to the angular velocity of the head, midpoint, and tail. Size  
517 measurements (i.e. area, perimeter, radii, spine length) were detrended using the ma  
518 function in the R package forecast (window size = 10) and converted to z-scores.  
519 Principal component analysis was used to control for potentially redundant information in  
520 the input features, yielding 8 principal components that explained >90% of the variance  
521 in the feature set. To find the appropriate timescale with which to analyze the behavioral  
522 features an empirical window search procedure was used (described in<sup>18</sup>). We  
523 constructed behavior spaces using the top 8 PCs sweeping window sizes ranging  
524 between 100 ms and 5 seconds. For a given window size (denoted  $w$ ), the windows

525 were compiled as follows: given frame  $i$ , the 8 PCs corresponding to frames  $i:i+w$  were  
526 linearized and concatenated, resulting in a vector with length  $8w$ . This was repeated for  
527 all windows in the data set and the resulting vectors were appended to produce a  
528 window matrix with  $8w$  rows. A behavior space was then constructed by embedding this  
529 matrix into low-dimensional space via the UMAP algorithm<sup>34</sup>. The appropriate window  
530 size was then determined by comparing the structural (Procrustes and Euclidean  
531 distance) and temporal features (recurrence) of behavior spaces produced from 20  
532 random trials per window size. As was found before<sup>18</sup>, a window size of 800ms was  
533 chosen.

534 We then created a behavior space encompassing the full control and transient  
535 inhibition datasets using this window size. Trials were first filtered to include those that  
536 were longer than 2.5 seconds and that traveled at least 50mm, resulting in 84 control  
537 and 97 transient inhibition trials and a total of 179,409 frames. The resulting behavior  
538 space captured the major components of the larval foraging ethogram (Figures 4B-C).  
539 Differences in behavior patterns between the conditions were inferred using 2-  
540 dimensional kernel density estimation (as in Figures 4B-C) computed over all trials for  
541 each condition. The difference map in Figure 4F was produced by first normalizing via  
542 division by the greatest value (to produce a range of values between 0 and 1) and then  
543 subtracting the transient inhibition map from the control map. Differences in individual  
544 feature distributions (as in Figure 4G) were assessed using a Kruskal-Wallis test  
545 comparing the mean value for each trial across conditions (for each test  $n = 84$  control  
546 and  $n = 97$  for inhibited). To control for the autocorrelation in behavior we sampled each  
547 measurement every 10th frame for a total of  $\sim 8,000$  measurements per condition.

548  
549 Louvain clustering was used to identify discrete components of behavior space. First,  
550 a graph was created with 2 sets of edges: the first representing the xy-coordinates in  
551 behavior space for each frame and the second corresponding to the xy-coordinates of  
552 the immediately following frame. This graph provides both information about the local  
553 neighborhood densities of the points in behavior space and the temporal sequencing  
554 between points over time. Louvain clustering was then run on this graph using the  
555 function `cluster_louvain` in the R package `igraph`<sup>35</sup>. Differences in occurrence in each

556 cluster between the conditions were assessed using a Kruskal-Wallis test, again  
557 comparing the occurrence density of all individual trials between the two conditions (n =  
558 84 control and n = 97 for inhibited).

559

## 560 **Acknowledgements**

561 We thank D. Berfin Azizoglu for comments on the manuscript. Stocks obtained from the  
562 Bloomington Drosophila Stock Center (NIH P40OD018537) were used in this study.  
563 Funding was provided by HHMI (CQD, AC-R), NIH HD27056 (CQD), F32NS105350-  
564 01A1, The Walter V. and Idun Berry Postdoctoral Fellowship, K99NS119295-01 (AC-R),  
565 the Stanford School of Medicine Dean's Fellowship (RAY), The Simons Foundation  
566 (TRC), and the National Defense Science & Engineering Graduate Fellowship, Stanford  
567 Graduate Fellowship, and Stanford Mind, Brain, Computation and Technology Training  
568 Program (MC).

569

## 570 **Author contributions**

571 Conceptualization, AC-R, CQD and TRC; Methodology: AC-R; Software, AC-R, RAY  
572 and MC; Formal analysis, AC-R, RAY and MC; Investigation, AC-R; Writing, AC-R, CQD  
573 and TRC; Visualization, AC-R, RAY and MC

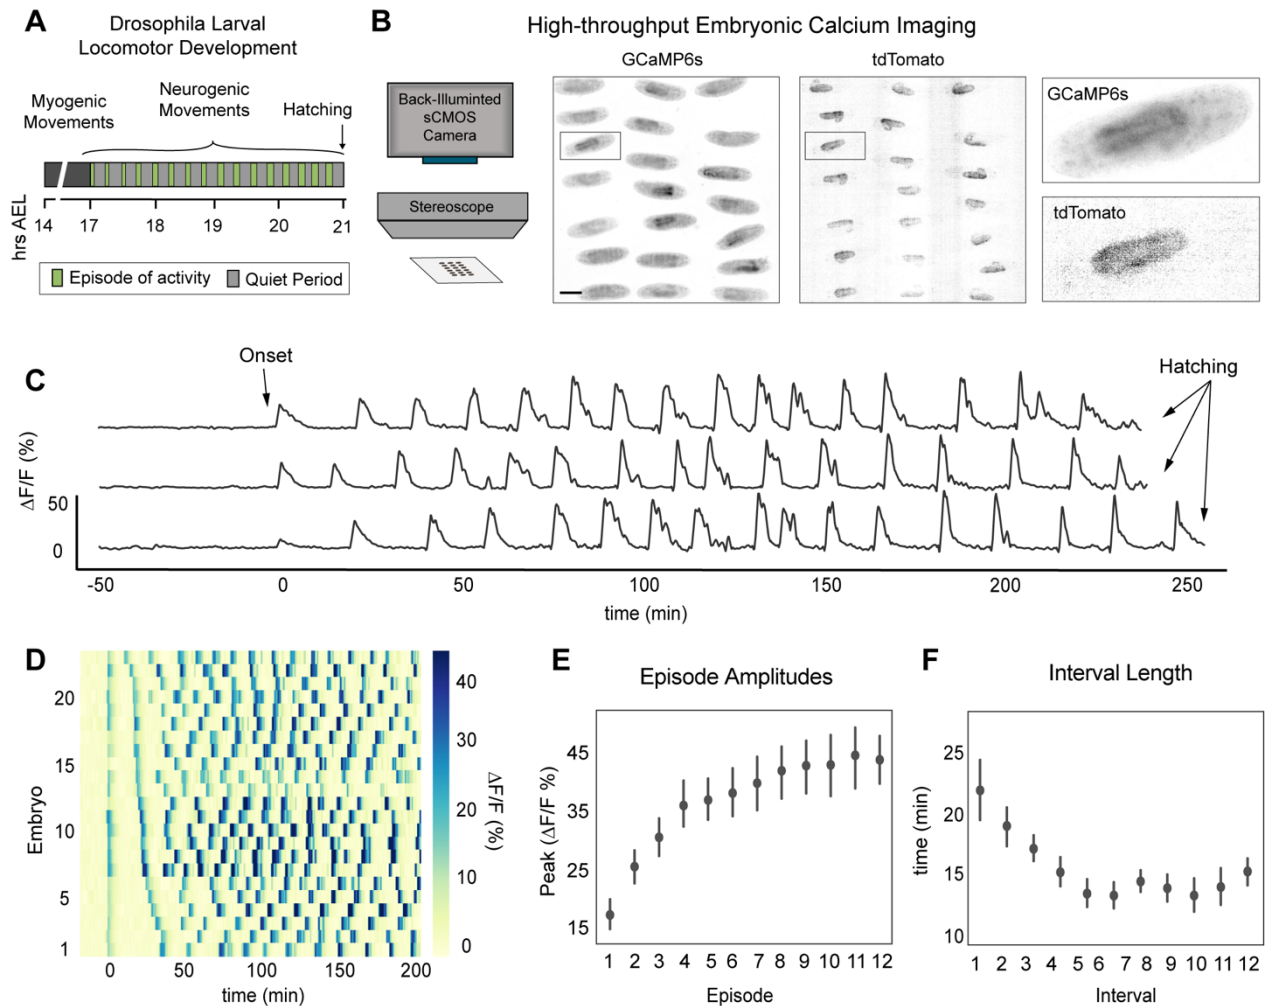

574

575 **Figure 1. Characterization of patterned spontaneous network activity in**

576 **Drosophila embryo**

577 **(A)** Schematic of *Drosophila* larval locomotor development. Time in hours after egg  
 578 laying (hrs AEL). **(B)** Schematic of high-throughput imaging system (left). Images of  
 579 GCaMP6s and tdTomato signal across the imaging field, color inverted for visualization  
 580 (right). Scale bar: 200  $\mu\text{m}$ . **(C)** GCaMP6s:TdTomato  $\Delta\text{F}/\text{F}$  traces from three individual  
 581 embryos. **(D)** Raster plot for PaSNA trimmed at 200 minutes post-onset, sorted by  
 582 distance between first and second peak, with each trace corresponding to an individual  
 583 embryo. Increasingly strong movements prevent accurate measurements at later  
 584 stages.  $\Delta\text{F}/\text{F}$  heat map scale to the right. **(E)**  $\Delta\text{F}/\text{F}$  peaks for episodes 1 through 12 (n  
 585 = 23). **(F)** Quantification of the first eleven interbout interval lengths (n = 23). For **(E)**  
 586 and **(F)**, points represent mean and lines depict the 95% confidence interval (CI). For  
 587 genotype information see Table S1.



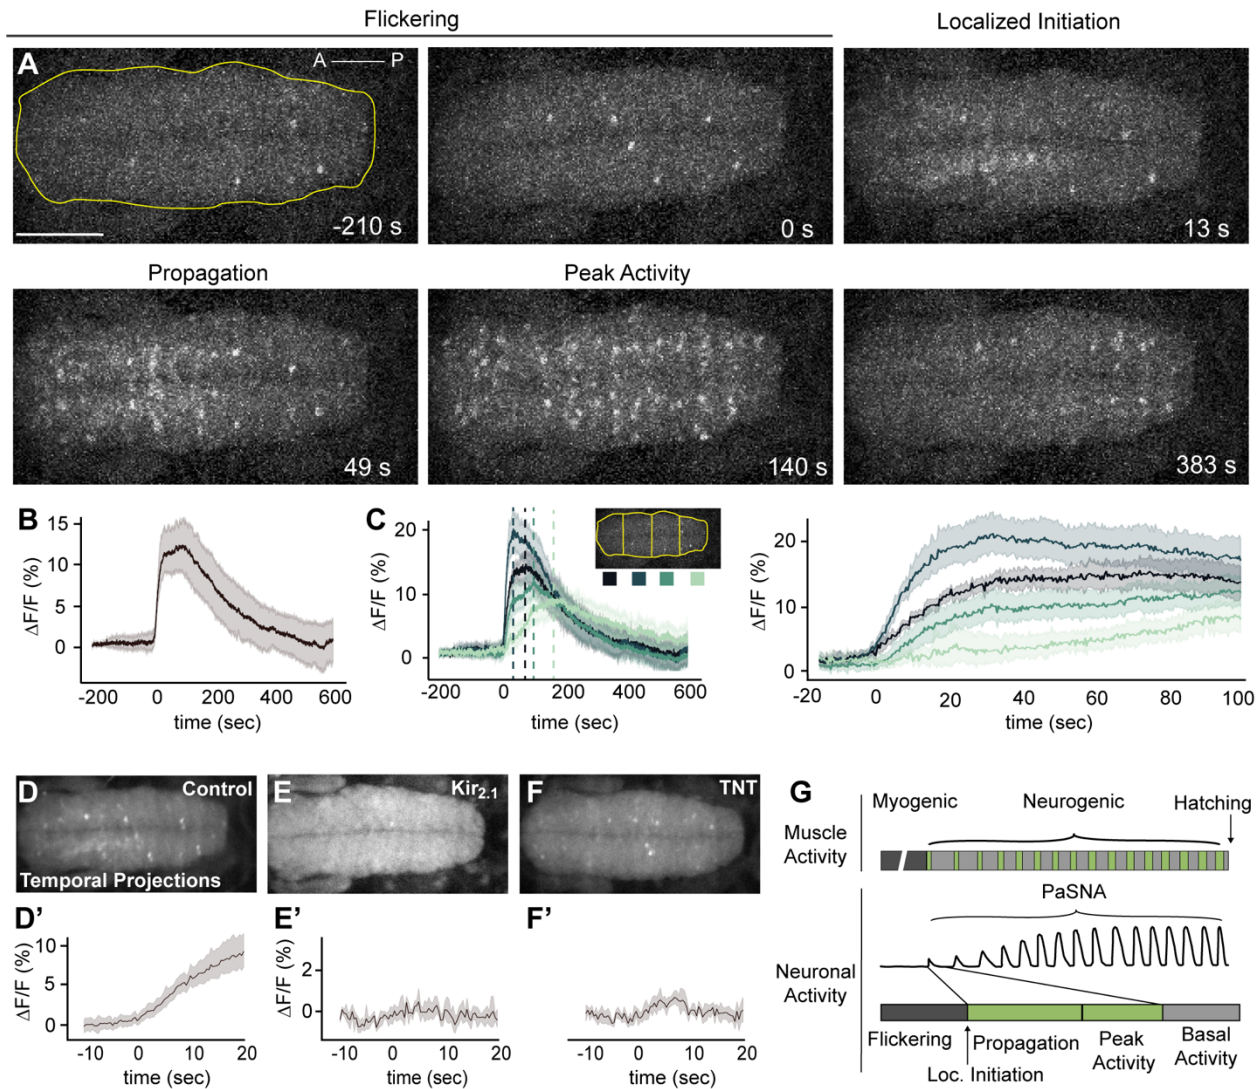

588

589

590 **Figure 2. Spatiotemporal and network properties of a single PaSNA episode**

591 **(A)** Image frames during the first episode of PaSNA in an embryo. Stages labeled on  
 592 top. Images are maximum intensity projections from an embryonic VNC expressing pan-  
 593 neuronal GCaMP6s. Time stamps are relative to the positive inflection point caused by  
 594 the activity burst. Yellow line delineates the VNC, with the ROI used for Panel B. Scale  
 595 bar: 50  $\mu$ m. **(B)**  $\Delta F/F$  trace of the entire VNC during the first episode of PaSNA (n = 8).  
 596 **(C)**  $\Delta F/F$  of the color-coded four ROIs. Left displays -200 seconds to 600 seconds; right  
 597 displays from -20 to 100 seconds relative to the initiation of PaSNA. **(D-F')** Temporal  
 598 projections (top) and  $\Delta F/F$  VNC traces (bottom) for 30 seconds near the localized  
 599 initiation time of the episode for control embryos (n = 8) **(D)**, embryos expressing Kir<sub>2.1</sub>

600 pan-neuronally (E) (n = 5) and embryos expressing TNT pan-neuronally (F) (n = 6). (G)  
 601 Schematic of *Drosophila* larval locomotor development showing activity at the muscle  
 602 (top) and neuronal level (bottom). For all time series, dark lines represent the mean,  
 603 while shading depicts the 95%CI. For genotype information see Table S1.  
 604  
 605

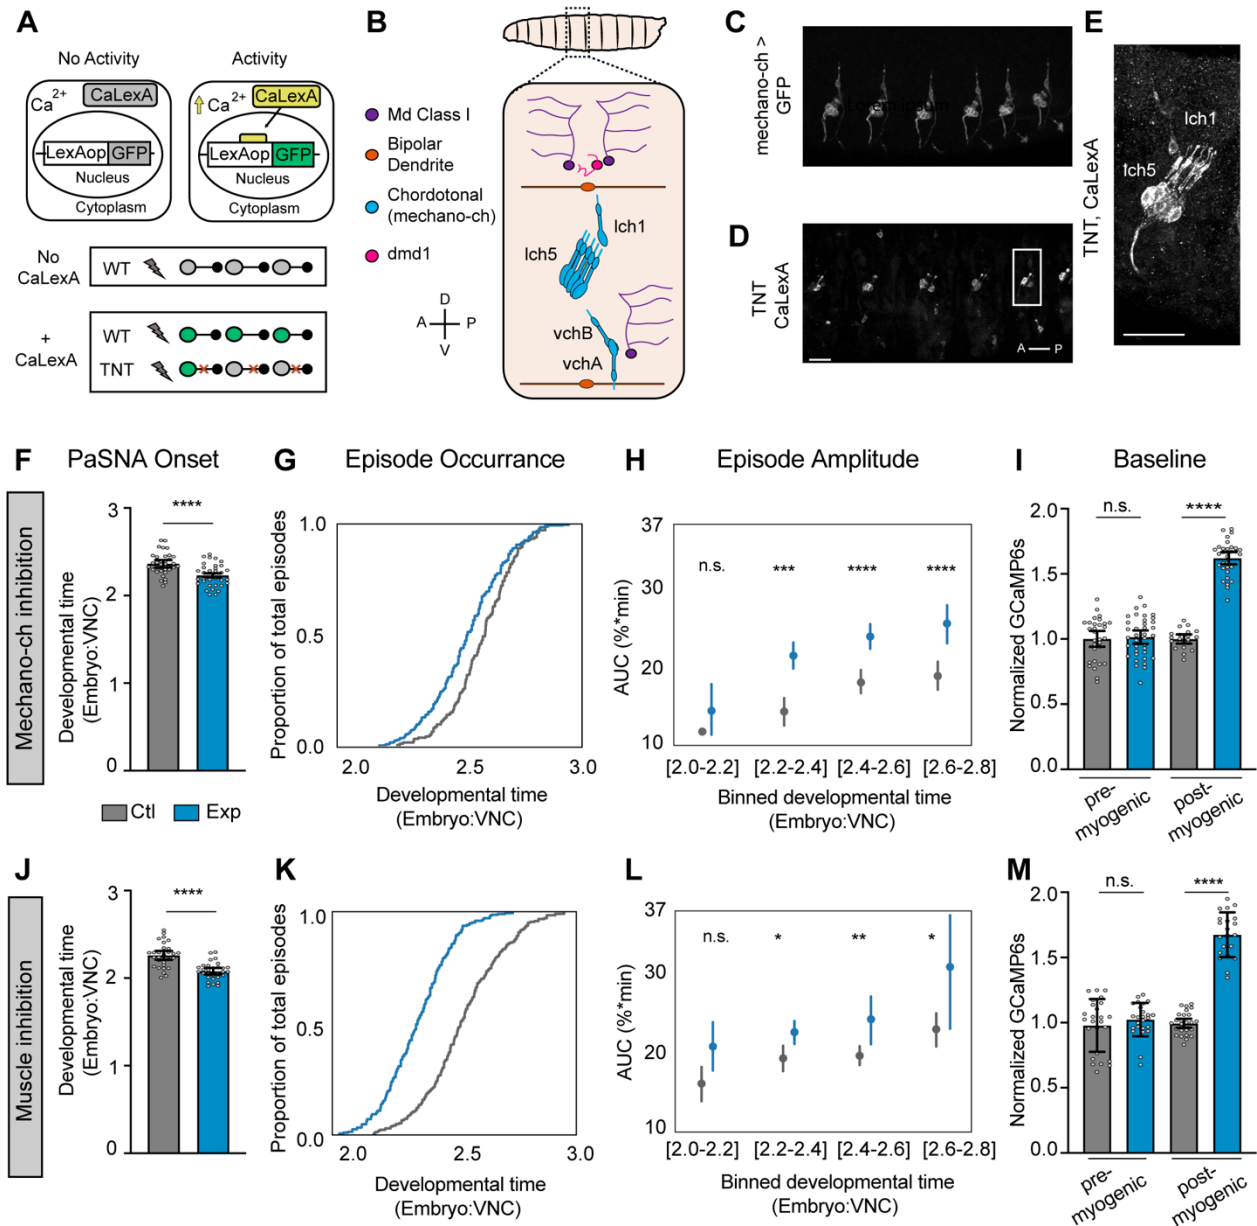

606

607 **Figure 3. Mechanosensory neurons modulate the amplitude of PaSNA episodes**



608 **(A)** Schematic illustration of the experiment using CaLexA to reveal neural activity  
609 during the myogenic phase. **(B)** Schematic of an embryonic anterior body wall  
610 hemisegment showing all proprioceptive neurons. There are eight mechanosensory  
611 chordotonal neurons (mechano-ch [blue]). Five of these form a laterally located  
612 cluster (lch5). A solitary mechano-ch is located dorsal to lch5 (lch1), and a pair of  
613 mechano-ch neurons is located ventrally (vchB and vchA). Anatomical coordinates:  
614 anterior (A), posterior (P), dorsal (D) and ventral (V). **(C)** Expression of the mechano-  
615 ch driver *inactive* (*iav*) along several body wall segments. **(D-E)** CaLexA driving GFP  
616 expression in a 19 hrs AEL embryo expressing pan-neuronal TNT (n= 30 embryos).  
617 Note expression in lch5 in every hemisegment as well as expression in lch1 and  
618 vchA/B in some segments. Scale bars: 20 $\mu$ m. **(F-I)** Measurements of the timing and  
619 intensity of PaSNA in control embryos (gray) and experimental embryos expressing  
620 TNT in mechano-ch neurons (blue). **(F)** Quantification of PaSNA onset (n = 36  
621 control; n = 33 experimental). **(G)** Cumulative occurrence of the first twelve episodes  
622 plotted as the proportion of total episodes across developmental time (n = 17 control;  
623 n = 32 experimental). **(H)** Area under the peak curve (AUC) quantification for the first  
624 twelve episodes plotted against developmental time. Values were binned based on  
625 developmental time (n = 17 control; n = 32 experimental). **(I)** Quantification of  
626 GCaMP6s baseline levels normalized against control mean before (14hrs AEL; n =  
627 30 control; n = 37 experimental) and after (10 minutes before PaSNA onset; n = 20  
628 control; n= 32 experimental) the myogenic phase. **(J-M)** Measurements of the timing  
629 and intensity of PaSNA in control embryos (gray) and experimental embryos  
630 expressing Kir<sub>2.1</sub> in muscles (blue). **(J)** Quantification of PaSNA onset (n = 36 control;  
631 n = 30 experimental). **(K)** Cumulative occurrence of the first twelve episodes plotted  
632 as the proportion of total episodes across developmental time (n = 28 control; n = 28  
633 experimental). **(L)** AUC quantification for the first twelve episodes plotted against  
634 binned developmental time (n = 28, control; n = 28 experimental). **(M)** Quantification  
635 of GCaMP6s baseline levels normalized against control mean before (n = 25 control;  
636 n = 25 experimental) and after (n = 26 control; n = 21 experimental) the myogenic  
637 phase. For **(H)** and **(L)**, points represent mean and lines depict the 95% confidence  
638 interval. For all bar graphs the mean and 95% CI are displayed. \*\*\*\*p<0.0001,

639 \*\*\* $p < 0.001$ , \*\* $p < 0.005$ , \* $p < 0.05$ . For (F) and (J) we used two-sample t-tests. For (H)  
 640 and (L) we used two-sample t-tests with Holm-Bonferroni correction. For (I) and (M)  
 641 we used two-sample Welch's t-tests to account for differences in variance. For  
 642 genotype information see Table S1.  
 643

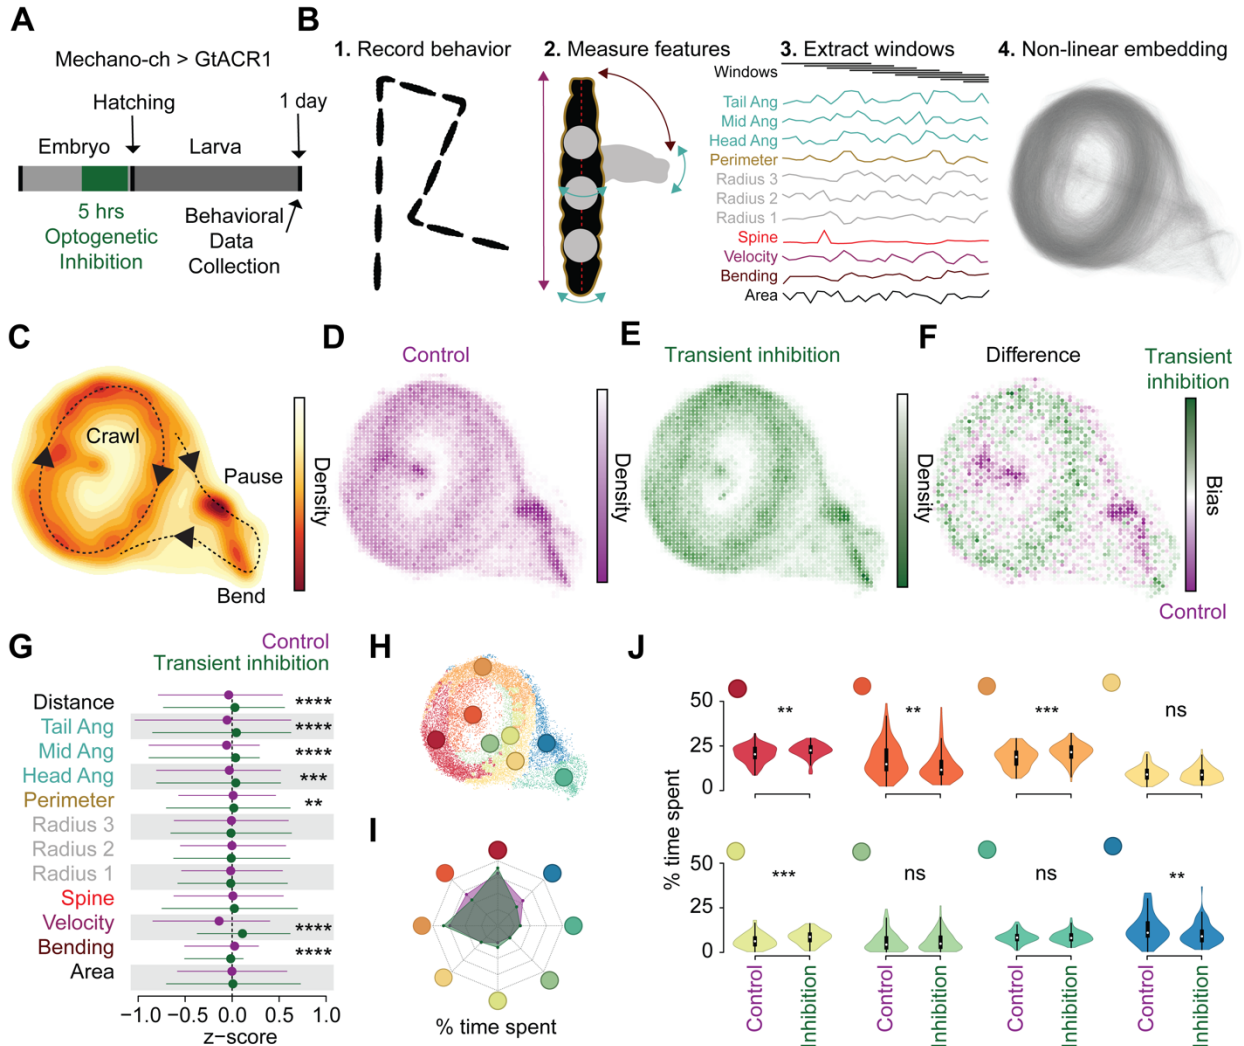

644

645

646 **Figure 4. Temporal embryonic inhibition of mechanosensory input leads to**  
 647 **abnormal larval behavior**

648 **(A)** Schematic of experimental design. **(B)** Workflow for Time Resolved Behavioral  
 649 Embedding (TREBLE) (Methods). **(C)** Probability density function of larval locomotor  
 650 space plotted as a heatmap. Behaviors annotated qualitatively. Density scale to the  
 651 right. **(D-E)** Bin-wise occurrence distributions for control (n= 84) (D) and transient

652 inhibition (n = 97) (E) groups. (F) Difference map between control (purple) and  
 653 transiently inhibited (green) animals. Bias scale to the right. (G) Comparison of primary  
 654 behavioral features between control (purple) and transiently inhibited (green) larvae. (H)  
 655 Behavioral space colored via Louvain clusters (Methods). (I) Radar chart comparing the  
 656 percentage of time spent in each of the Louvain clusters for control (purple shade) and  
 657 transient inhibition (green shade) groups. (J) Differences in occurrence in each  
 658 behavioral cluster between control and transiently inhibited animals. \*\*\*\* p < 0.0001, \*\*\*  
 659 p < 0.001, \*\* p < 0.01. For (G) we used trial-wise Kruskal-Wallis test with Bonferroni  
 660 correction. For (J) we used trial-wise Kruskal-Wallis test. For genotype information see  
 661 Table S1.

662  
 663  
 664

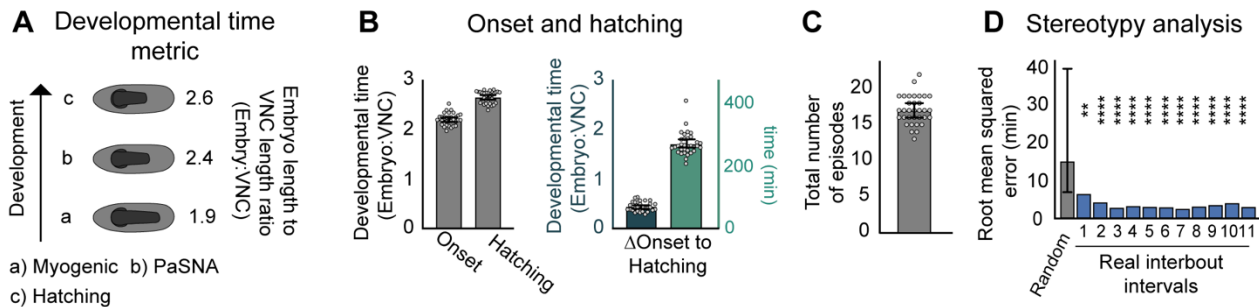

665  
 666

667 **Figure S1 related to Figure 1. Onset and length of PaSNA quantification.**

668 (A) Developmental time metric used to quantify PaSNA onset and progression. (B)  
 669 Onset and hatching measurements of PaSNA (n = 33). (C) Number of total  
 670 episodes from PaSNA onset to hatching (n = 33). Bar plots represent mean with  
 671 95% confidence interval. (D) Interval stereotypy analysis in which the distribution of  
 672 interpeak intervals across all embryos are compared to Poisson processes with the  
 673 same mean (see Methods). \*\* p < 0.01, \*\*\* p < 0.001, \*\*\*\* p < 0.0001; two-sample t-  
 674 test, Holm-Bonferroni correction.



676 **Figure S2 related to Figure 3. Mechanosensory neurons modulate the**  
677 **amplitude of PaSNA episodes.**

678 **(A-C)** Quantification of PaSNA phenotypes in control embryos in gray and  
679 experimental embryos expressing TNT in mechano-ch in blue. **(A)** Total number of  
680 episodes from PaSNA onset to hatching (n = 16 control; n = 28 experimental). **(B)**  
681 Time span from PaSNA onset to hatching (n = 16 control; 28 experimental). **(C)**  
682 Quantification of the first eleven interbout interval length (n = 17 control; n = 32  
683 experimental). **(D)** Quantification of the first eleven interbout interval lengths (n =  
684 28 control; n = 28 experimental) for control embryos in gray and experimental  
685 embryos expressing Kir<sub>2.1</sub> in muscles in blue. **(E-K)** Measurements of the timing  
686 and intensity of PaSNA for control embryos (gray) and experimental embryos  
687 expressing Kir<sub>2.1</sub> in mechano-ch neurons (blue). **(E)** Quantification of PaSNA onset  
688 (n = 30 control; n = 41 experimental). **(F)** Cumulative occurrence of the first twelve  
689 episodes plotted as the proportion of total episodes across developmental time (n =  
690 27 control; n = 29 experimental). **(G)** AUC quantification for the first twelve  
691 episodes plotted against binned developmental time (n = 26, control; n = 41  
692 experimental). **(H)** Quantification of GCaMP6s baseline levels normalized against  
693 control mean before (n = 28 control; n = 24 experimental) and after the myogenic  
694 phase (n = 28 control; n = 28 experimental). **(I)** Total number of episodes from  
695 PaSNA onset to hatching (n = 24 control; n = 41 experimental). **(J)** Time span from  
696 PaSNA onset to hatching (n = 26 control; n = 41 experimental). **(K)** Quantification  
697 of the first eleven interbout interval lengths (n = 27 control; n = 29 experimental).  
698 **(L)** Raw GCaMP6s baselines for control (gray) and experimental (blue) groups.  
699 Different experiments labeled on the X axis. As GCaMP6s and TdTomato are  
700 expressed at low levels during the pre-myogenic stage, we increased excitation  
701 power at this stage, making direct comparisons between pre- and post-myogenic  
702 stages impossible. For all point plots, points represent mean and lines depict the  
703 95% confidence interval. For all bar graphs the mean and 95% CI are displayed.  
704 \*\*\*\*p<0.0001, \*\*\*p<0.005, \*\*p<0.005, \*p<0.05. For **(A)**, **(B)**, **(E)**, **(I)** and **(J)** we used  
705 a two-sample t-test. For **(C)**, **(D)**, **(G)** and **(K)** we used two-sample t-tests with  
706 Holm-Bonferroni correction. For **(H)** we used two-sample Welch's t-tests to account



707 for difference in variance. For (L) we used a Brown-Forsythe and Welch ANOVA  
708 followed by a Dunnett's T3 multiple comparison test to account for differences in  
709 variance. For genotypes information see Table S1.  
710

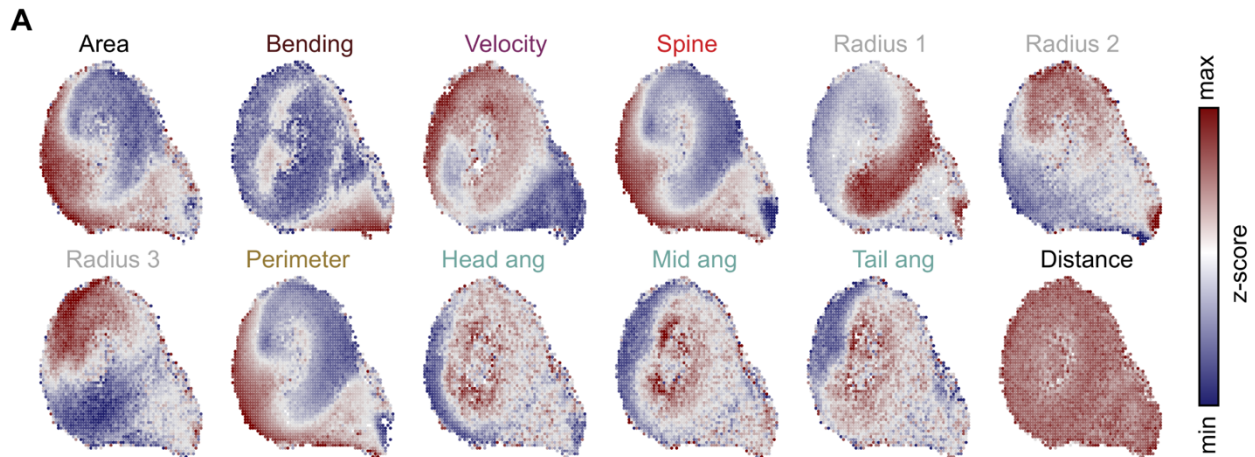

711  
712 **Figure S3 related to Figure 4. Primary behavioral metrics as a function of**  
713 **larval behavioral space.**

714 The distribution of area, bending, velocity, spine length, radius 1, radius 2, radius 3,  
715 perimeter, head angle, middle body angle, tail angle, and distance as a function of  
716 larval behavior space (z-scores). Z-score scale to the right.

717  
718 **Video S1 High-throughput wide-field calcium imaging.** Pan-neuronal GCaMP6s  
719 (top) and TdTomato (bottom) signals of an individual representative embryo throughout  
720 PaSNA at 750 times real time speed. Video is an XY cropped region from the time-  
721 lapse used for the snapshot shown on Figure 1. Scale bar is 100 $\mu$ m and the timestamp  
722 is in minutes:seconds.

723  
724 **Video S2 Two-photon calcium imaging of the first PaSNA episode.** Maximum  
725 intensity projections of pan-neuronal GCaMP6s signals in a representative control  
726 embryo imaged using two photon microscopy.

727

728 **Video S3 PaSNA depends on depolarizations.** Maximum intensity projections of pan-  
729 neuronal GCaMP6s signals in a representative embryo expressing Kir2.1 pan-  
730 neuronally, imaged using two photon microscopy.

731

732 **Video S4 PaSNA depends on synaptic transmission.** Maximum intensity projections  
733 of pan-neuronal GCaMP6s signals in a representative embryo expressing TNT pan-  
734 neuronally, imaged using two photon microscopy.



## 735 References

- 736 1. Goodman, C.S., and Shatz, C.J. (1993). Developmental mechanisms that generate precise  
737 patterns of neuronal connectivity. *Cell* 72, 77–98.
- 738 2. Kirkby, L.A., Sack, G.S., Firl, A., and Feller, M.B. (2013). A role for correlated spontaneous  
739 activity in the assembly of neural circuits. *Neuron* 80, 1129–1144.
- 740 3. Thompson, A., Gribizis, A., Chen, C., and Crair, M.C. (2017). Activity-dependent  
741 development of visual receptive fields. *Current Opinion in Neurobiology* 42, 136–143.
- 742 4. Peraanu, W., Spindler, S., Im, E., Buu, N., and Hartenstein, V. (2007). The Emergence of  
743 Patterned Movement During Late Embryogenesis of *Drosophila*. *Dev Neurobiology*, 1669–  
744 1685.
- 745 5. Crisp, S., Evers, J.F., Fiala, A., and Bate, M. (2008). The development of motor coordination  
746 in *Drosophila* embryos. *Development* 3717, 3707–3717.
- 747 6. Crisp, S.J., Evers, J.F., and Bate, M. (2011). Endogenous Patterns of Activity Are Required  
748 for the Maturation of a Motor Network. *J. Neurosci* 31, 10445–10450.
- 749 7. Campos-Ortega, J.A., and Hartenstein, V. (2013). *The Embryonic Development of*  
750 *Drosophila melanogaster* (Springer Science & Business Media).
- 751 8. Olofsson, B., and Page, D.T. (2005). Condensation of the central nervous system in  
752 embryonic *Drosophila* is inhibited by blocking hemocyte migration or neural activity. *Dev.*  
753 *Biol.* 279, 233–243.
- 754 9. Baines, R.A., Uhler, J.P., Thompson, A., Sweeney, S.T., and Bate, M. (2001). Altered  
755 Electrical Properties in *Drosophila* Neurons Developing without Synaptic Transmission. *J.*  
756 *Neurosci.* 21, 1523 LP–1531.
- 757 10. Masuyama, K., Zhang, Y., Rao, Y., and Wang, J.W. (2012). Mapping Neural Circuits with  
758 Activity-Dependent Nuclear Import of a Transcription Factor. *J. Neurogenet.* 26, 89–102.
- 759 11. Hehlert, P., Zhang, W., and Göpfert, M.C. (2020). *Drosophila* Mechanosensory  
760 Transduction. *Trends Neurosci.*
- 761 12. Fushiki, A., Kohsaka, H., and Nose, A. (2013). Role of Sensory Experience in Functional  
762 Development of *Drosophila* Motor Circuits. *PLoS One* 8, 1–10.
- 763 13. Caldwell, J.C., Miller, M.M., Wing, S., Soll, D.R., and Eberl, D.F. (2003). Dynamic analysis of  
764 larval locomotion in *Drosophila* chordotonal organ mutants. *Proc. Natl. Acad. Sci. U. S. A.*  
765 100, 16053–16058.
- 766 14. Cheng, L.E., Song, W., Looger, L.L., Jan, L.Y., and Jan, Y.N. (2010). The role of the TRP  
767 channel NompC in *Drosophila* larval and adult locomotion. *Neuron* 67, 373–380.
- 768 15. Zarin, A.A., Mark, B., Cardona, A., Litwin-Kumar, A., and Doe, C.Q. (2019). A multilayer  
769 circuit architecture for the generation of distinct locomotor behaviors in *Drosophila*. *Elife* 8.
- 770 16. Mohammad, F., Stewart, J., Ott, S., Chlebikova, K., Chua, J.Y., Koh, T.-W., Ho, J., and  
771 Claridge-Chang, A. (2017). Optogenetic inhibition of behavior with anion channelrhodopsins.

- 772 Nat. Methods 14, 271–274.
- 773 17. Risse, B., Thomas, S., Otto, N., Löpmeier, T., Valkov, D., Jiang, X., and Klämbt, C. (2013).  
774 FIM, a Novel FTIR-Based Imaging Method for High Throughput Locomotion Analysis. PLoS  
775 One 8.
- 776 18. York, R.A., Carreira-Rosario, A., Giocomo, L.M., and Clandinin, T.R. (2021). Flexible  
777 analysis of animal behavior via time-resolved manifold embedding. Cold Spring Harbor  
778 Laboratory, 2020.09.30.321406.
- 779 19. Green, C.H., Burnet, B., and Connolly, K.J. (1983). Organization and patterns of inter- and  
780 intraspecific variation in the behaviour of *Drosophila* larvae. Anim. Behav. 31, 282–291.
- 781 20. Clark, M.Q., McCumsey, S.J., Lopez-Darwin, S., Heckscher, E.S., and Doe, C.Q. (2016).  
782 Functional Genetic Screen to Identify Interneurons Governing Behaviorally Distinct Aspects  
783 of *Drosophila* Larval Motor Programs. G3 6, 2023–2031.
- 784 21. Akin, O., Bajar, B.T., Keles, M.F., Frye, M.A., and Zipursky, S.L. (2019). Cell-type-Specific  
785 Patterned Stimulus-Independent Neuronal Activity in the *Drosophila* Visual System during  
786 Synapse Formation. Neuron 101, 894–904.e5.
- 787 22. Khazipov, R., and Luhmann, H.J. (2006). Early patterns of electrical activity in the  
788 developing cerebral cortex of humans and rodents. Trends Neurosci. 29, 414–418.
- 789 23. Momose-Sato, Y., and Sato, K. (2013). Large-scale synchronized activity in the embryonic  
790 brainstem and spinal cord. Front. Cell. Neurosci. 7, 36.
- 791 24. Pulver, S.R., Bayley, T.G., Taylor, A.L., Berni, J., Bate, M., and Hedwig, B. (2015). Imaging  
792 fictive locomotor patterns in larval *Drosophila*. J. Neurophysiol. 114, 2564–2577.
- 793 25. Heckscher, E.S., Lockery, S.R., and Doe, C.Q. (2012). Characterization of *Drosophila* larval  
794 crawling at the level of organism, segment, and somatic body wall musculature. J. Neurosci.  
795 32, 12460–12471.
- 796 26. Giachello, C.N.G., and Baines, R.A. (2015). Inappropriate Neural Activity during a Sensitive  
797 Period in Embryogenesis Results in Persistent Seizure-like Behavior. Curr. Biol. 25, 2964–  
798 2968.
- 799 27. Giachello, C.N.G., and Baines, R.A. (2017). Regulation of motoneuron excitability and the  
800 setting of homeostatic limits. Curr. Opin. Neurobiol. 43, 1–6.
- 801 28. Valdes-Aleman, J., Fetter, R.D., Sales, E.C., Heckman, E.L., Venkatasubramanian, L., Doe,  
802 C.Q., Landgraf, M., Cardona, A., and Zlatic, M. (2021). Comparative Connectomics Reveals  
803 How Partner Identity, Location, and Activity Specify Synaptic Connectivity in *Drosophila*.  
804 Neuron 109, 105–122.e7.
- 805 29. Makino, H., Hwang, E.J., Hedrick, N.G., and Komiyama, T. (2016). Circuit Mechanisms of  
806 Sensorimotor Learning. Neuron 92, 705–721.
- 807 30. Shearin, H.K., Dvarishkis, A.R., Kozeluh, C.D., and Stowers, R.S. (2013). Expansion of the  
808 gateway multisite recombination cloning toolkit. PLoS One 8, e77724.
- 809 31. Manning, L., and Doe, C.Q. (2017). Immunofluorescent antibody staining of intact

- 810           Drosophila larvae. *Nat. Protoc.* *12*, 1–14.
- 811   32. Risse, B., Berh, D., Otto, N., Klämbt, C., and Jiang, X. (2017). FIMTrack: An open source  
812       tracking and locomotion analysis software for small animals. *PLoS Comput. Biol.* *13*.
- 813   33. Risse, B., Otto, N., Berh, D., Jiang, X., and Klämbt, C. (2014). FIM imaging and FIMtrack:  
814       Two new tools allowing high-throughput and cost effective locomotion analysis. *J. Vis. Exp.*
- 815   34. McInnes, L., Healy, J., and Melville, J. (2018). UMAP: Uniform Manifold Approximation and  
816       Projection for Dimension Reduction. *arXiv [stat.ML]*.
- 817   35. Csardi, G., Nepusz, T., and Others (2006). The igraph software package for complex  
818       network research. *InterJournal, complex systems* *1695*, 1–9.
- 819
